# Supplementary material
Source: PubMed Central journal article supplement (PMC3080608)
Supplement: supp_ddr078_ddr078supp.pdf [file supp_ddr078_ddr078supp.pdf]

## **Supplementary Data**

### **Copy number gain at Xp22.31 includes complex duplication rearrangements and recurrent triplications**

Pengfei Liu, Ayelet Erez, Sandesh C. Sreenath Nagamani, Weimin Bi, Claudia M. B. Carvalho, Alexandra D. Simmons, Joanna Wiszniewska, Ping Fang, Patricia A. Eng, M. Lance Cooper, V. Reid Sutton, Elizabeth R. Roeder, John B. Bodensteiner, Mauricio R. Delgado, Siddharth K. Prakash, John W. Belmont, Pawel Stankiewicz, Jonathan S. Berg, Marwan Shinawi, Ankita Patel, Sau Wai Cheung, James R. Lupski

**Table S1.** Detailed clinical data specifically for each patient.

|                              | Recurrent Duplications |      |      |      |      |      |      |      |                   |                   |                   |                   |                   |      | Recurrent Triplications |      |      |
|------------------------------|------------------------|------|------|------|------|------|------|------|-------------------|-------------------|-------------------|-------------------|-------------------|------|-------------------------|------|------|
| BAB numbers                  | 2829                   | 2830 | 2831 | 2835 | 2843 | 2844 | 2845 | 2937 | 3081 <sup>a</sup> | 3082 <sup>a</sup> | 2814 <sup>b</sup> | 2815 <sup>b</sup> | 2846 <sup>c</sup> | 2862 | 2822                    | 2817 | 2828 |
| Sex                          | M                      | M    | M    | F    | F    | M    | M    | M    | M                 | M                 | M                 | M                 | F                 | M    | M                       | M    | F    |
| Inheritance                  | NA                     | NA   | NA   | NA   | Mat  | NA   | Mat  | Mat  | NA                | NA                | Mat               | Mat               | NA                | NA   | Mat                     | Mat  | DN   |
| XCI result                   | NA                     | NA   | NA   | Rdm  | Skw  | NA   | NA   | NA   | NA                | NA                | NA                | NA                | NI                | NA   | NA                      | NA   | Rdm  |
| Additional CNV               | +                      | -    | +    | +    | -    | +    | -    | -    | -                 | -                 | -                 | -                 | -                 | +    | -                       | -    | +    |
| Birth defects                | -                      | -    | -    | +    | -    | -    | -    | -    | -                 | -                 | -                 | -                 | -                 | -    | +                       | -    | -    |
| GER                          | -                      | -    | +    | -    | -    | +    | -    | -    | +                 | -                 | -                 | -                 | -                 | -    | -                       | +    | -    |
| Delay- gross motor           | -                      | -    | -    | +    | +    | +    | -    | +    | +                 | +                 | +                 | +                 | -                 | -    | +                       | +    | +    |
| Delay- Speech                | -                      | -    | -    | +    | +    | +    | -    | +    | +                 | +                 | +                 | +                 | -                 | +    | +                       | +    | +    |
| Developmental regression     | -                      | -    | -    | -    | +    | -    | -    | -    | -                 | -                 | -                 | +                 | -                 | -    | -                       | -    | -    |
| Seizures                     | -                      | -    | +    | +    | -    | -    | -    | -    | -                 | -                 | -                 | -                 | -                 | -    | -                       | -    | -    |
| Hypotonia                    | -                      | -    | -    | +    | -    | -    | -    | +    | +                 | +                 | -                 | -                 | -                 | -    | -                       | +    | +    |
| Autism Spectrum              | -                      | +    | -    | -    | -    | -    | +    | +    | +                 | +                 | +                 | +                 | -                 | -    | -                       | -    | -    |
| ADHD                         | -                      | -    | -    | -    | -    | -    | -    | -    | -                 | -                 | -                 | -                 | -                 | -    | +                       | +    | -    |
| CHD                          | -                      | -    | -    | -    | -    | -    | -    | -    | -                 | -                 | -                 | -                 | -                 | -    | -                       | -    | -    |
| Macrocephaly >95%            | +                      | -    | -    | -    | -    | -    | +    | -    | -                 | -                 | +                 | +                 | -                 | -    | -                       | -    | +    |
| Microcephaly <5%             | -                      | -    | -    | +    | -    | -    | -    | -    | -                 | -                 | -                 | -                 | -                 | -    | -                       | -    | -    |
| Short stature                | +                      | -    | -    | +    | -    | -    | -    | -    | -                 | -                 | -                 | -                 | -                 | -    | +                       | -    | -    |
| Facial dysmorphism           | -                      | -    | -    | +    | -    | -    | +    | -    | -                 | -                 | -                 | -                 | -                 | -    | +                       | -    | -    |
| Retinal or eye abnormalities | -                      | -    | -    | +    | -    | -    | -    | -    | -                 | -                 | -                 | -                 | -                 | -    | +                       | -    | -    |
| MRI/CT brain abnormalities   | -                      | -    | -    | +    | -    | -    | +    | -    | -                 | -                 | -                 | +                 | -                 | -    | -                       | -    | -    |
| EEG abnormalities            | -                      | -    | +    | +    | -    | -    | -    | +    | -                 | -                 | -                 | -                 | -                 | -    | -                       | -    | -    |

a. BAB3081 and BAB3082 are twins. b. BAB2814 and BAB2815 are brothers. c. BAB2846 had maternal alcohol and drug exposure along with anti-seizure medication history during pregnancy.

Abbreviations: “+”, feature is present; “-”, feature is not present or not known; GER, gastro-esophageal reflux; ADHD, attention-deficit hyperactivity disorder; CHD, congenital heart disease; NA, not available; Mat, maternal; DN, *de novo*; Rdm, random XCI; Skw, skewed XCI; NI, non-informative.

**Table S2.** X-inactivation studies in 23 patients and five mothers with Xp22.31

duplications

|                 | Recurrent dup |            | Recurrent trip |            | Nonrecurrent dup |            |
|-----------------|---------------|------------|----------------|------------|------------------|------------|
|                 | Mother(s)     | Patient(s) | Mother(s)      | Patient(s) | Mother(s)        | Patient(s) |
| Random          | 1             | 12         | 1              | 1          | 0                | 4          |
| Skewed          | 0             | 4          | 0              | 0          | 1                | 0          |
| Non-informative | 0             | 1          | 2              | 0          | 0                | 1          |

Skewed XCI is defined as the inactivation ratio greater than 80:20. The “nonrecurrent dup” category includes both the subjects with simple nonrecurrent duplication and the subjects with complex rearrangements. The four patients with recurrent duplication who showed skewed XCI are BAB2840, BAB2843, BAB2863 and BAB2936. It is unclear which X chromosome is preferentially inactivated due to lack of parental DNA samples. The one carrier mother of the nonrecurrent duplication who showed skewed XCI is the mother of BAB2824. In this subject, the X chromosome with duplication is preferentially activated. Abbreviations: dup, duplication; trip, triplication.

**Table S3.** Additional chromosomal CNV findings in the subjects with the recurrent Xp22.31 duplication or triplication.

| BAB numbers | Type          | Maximum size         | Minimum size       | Minimum coordinate                                          | Additional CNV directly contributing to phenotype |
|-------------|---------------|----------------------|--------------------|-------------------------------------------------------------|---------------------------------------------------|
| 2829        | Gain          | 6.43 Mb              | 134 kb             | Chr3:110,195,502-110,329,344                                | No                                                |
| 2831        | Loss          | 3.91 Mb              | 626 kb             | Chr8:305,404-931,391                                        | No                                                |
| 2835        | Loss          | 94.2 kb              | 86.2 kb            | Chr8:9,945,886-10,032,091                                   | No                                                |
| 2841        | Gain          | 2.50 Mb              | 181 kb             | Chr4:188,678,418-188,859,354                                | No                                                |
| 2844        | Loss;<br>Gain | 929 kb;<br>1.20 Mb   | 630 kb;<br>934 kb  | Chr14:83,957,837-84,587,455<br>Chr21:27,204,228-28,137,956  | No                                                |
| 2846        | Gain          | 47.1 Mb              | 38.4 Mb            | Chr9:360,184-38,713,752                                     | Yes                                               |
| 2850        | Gain          | 657 kb               | 402 kb             | Chr7:152,619,353-153,021,406                                | No                                                |
| 2851        | Loss          | 244 kb               | 187 kb             | Chr12:13,577,342-13,764,730                                 | No                                                |
| 2863        | Loss;<br>Gain | 8.23 Mb;<br>19.94 Mb | 297 kb;<br>2.34 Mb | Chr2:110,050,644-110,347,650<br>Chr16:45,675,606-48,023,182 | No                                                |
| 2864        | Loss          | 3.52 Mb              | 535 kb             | chr7:75,048,098-75,583,095                                  | No                                                |
| 2828        | Gain          | 6.70 Mb              | 3.99 Mb            | chr7:149,041,960-153,029,489                                | Yes                                               |

**Table S4.** MLPA probe sequences.

| Name         | Type <sup>a</sup> | Sequence <sup>b</sup>                                                                |
|--------------|-------------------|--------------------------------------------------------------------------------------|
| KAL1-104-L   | XR                | <u>GGGTTCCCTAAGGGTTGGAT</u> ACCTGAACCAATGCAAAGGCCATCCA<br>GTGA                       |
| KAL1-104-R   | XR                | AGGGCTGCCATGGTTCCTCAACGTTGGAAGTTCTAGATTGGATCTTG<br><u>CTGGCAC</u>                    |
| ACTA2-108-L  | AR                | <u>GGGTTCCCTAAGGGTTGGATT</u> AGTGCAGTAGGACAGAGCCTGGATGT<br>TCTAC                     |
| ACTA2-108-R  | AR                | CATGGCCTAGTTTCTTGTTCAGCAGGGACACAGTCTAGATTGGATCT<br><u>TGCTGGCAC</u>                  |
| HDHD1A-112-L | XT                | <u>GGGTTCCCTAAGGGTTGGAT</u> GCTGTCTAATGTTCTCCGGGGTCACTG<br>AAATGTG                   |
| HDHD1A-112-R | XT                | ATCGGCCTAAACTCCTCCAGCCAAAGAAGCACCTTCTAGATTGGAT<br><u>CTTGCTGGCAC</u>                 |
| PNPLA4-116-L | XT                | <u>GGGTTCCCTAAGGGTTGGAT</u> CCTAAGCGCTATGAGGTAGGTGGATTGT<br>AGGGAGCTT                |
| PNPLA4-116-R | XT                | GAATTGATATAGGCTGTGGGAAGCTCCTGGGTGAGAATCTAGATTGG<br><u>ATCTTGCTGGCAC</u>              |
| TERT-120-L   | AR                | <u>GGGTTCCCTAAGGGTTGGAG</u> TCTACCATTGAGCCGGCAAACACCTCA<br>GAAACATACCA               |
| TERT-120-R   | AR                | GATGAGACCTCTGAACAAACAATCCCTGCTCCCCACTCTTCTAGATT<br><u>GGATCTTGCTGGCAC</u>            |
| VCX3Ap-124-L | XT                | <u>GGGTTCCCTAAGGGTTGGAG</u> TCTGAGAGCTTCCAAATCCTCCAGAC<br>AGGTGAAAGTGTT              |
| VCX3Ap-124-R | XT                | CCTCCAGTTTGCATCCACCACCACATGTTTTATGCCTCCTCTCTAGAT<br><u>TGGATCTTGCTGGCAC</u>          |
| B2M-128-L    | AR                | <u>GGGTTCCCTAAGGGTTGGACA</u> AGATGGTTACCAAGACTGTTGAGGA<br>CGCCAGAGATCTTGAG           |
| B2M-128-R    | AR                | CACTTTCTAAGTACCTGGCAATACACTAAGCGCGCTCACCTTTTCTA<br><u>GATTGGATCTTGCTGGCAC</u>        |
| VCX3Ap-132-L | XT                | <u>GGGTTCCCTAAGGGTTGGACT</u> CCTTTTTTCTGGACTAGGGATCTTGA<br>AGCATGGAGTTGTGCA          |
| VCX3Ap-132-R | XT                | CTATCTTGTAACCATAAAGCCTGAGGACGAAAGCCTGGAGCCTAGTC<br><u>TAGATTGGATCTTGCTGGCAC</u>      |
| STS-136-L    | XT                | <u>GGGTTCCCTAAGGGTTGGAC</u> GCATGTGGCAAAGCTCACCATCTTCAC<br>TACAAACACGCCTGAGAGT       |
| STS-136-R    | XT                | GGCACTGGGGAAACATAACTCCATCTACACCTTGGATTTGGACTGAT<br><u>TCTAGATTGGATCTTGCTGGCAC</u>    |
| GPD1-140-L   | AR                | <u>GGGTTCCCTAAGGGTTGGAC</u> GAGATTGGTTTGGAGGTCCTCTCGGGG<br>AGTTTCGGAGGTATAAAGGAA     |
| GPD1-140-R   | AR                | TGCCTGGGAGATATGAGAAGCGGGCTGGTTTGGAGAAGTGTGAAGAG<br><u>TAGTCTAGATTGGATCTTGCTGGCAC</u> |

- a. Abbreviations: XT, X chromosomal test probe; XR, X chromosomal reference probe; AR, autosomal reference probe.
- b. The underlined sequences are primer-binding sequences.

**Table S5.** Primer sequences and PCR assays.

| Breakpoint                              | Primer-1                               | Primer-2                        |
|-----------------------------------------|----------------------------------------|---------------------------------|
| BAB2824 <sup>a</sup>                    | TTGGGACAAGCAGTTTGGAGTACATA             | GGTCACCATGCCAGATACCGTCA         |
| BAB2852 <sup>a</sup>                    | GTGTAGATGTGGGAGATCCGCTGTG              | AGCCCAGCTGAAGCCCTTTAGACA        |
| BAB3087 <sup>a</sup>                    | CATCACTTACCTGCCATTTCTCCCTCT            | GGACCCTAGGGCATATCTGAAGTT<br>G   |
| BAB3090 <sup>a</sup>                    | CAATGGATTTCTGGTAGGCAAACAAC             | CGGGTGATGAGAATCTGAATTTGA        |
| BAB3093 <sup>a</sup>                    | ATACTAATCCAGGCAGGGCAGGC                | AAGGTAGAGGAAAGTCGGCAAGG<br>TCAG |
| BAB3096 <sup>a</sup>                    | ATGGCCCAGTGTCTAAGCTATTTCTC             | ACCCATGGCCTTTGATCCTAATCT<br>TGA |
| BAB2833 <sup>a</sup>                    | GTTGGAGACAGATGCAACCTCTGTG              | CTTGTTTCTGTCAACCTTCTTTGCC       |
| BAB3088 <sup>a</sup>                    | TTCACCAATGCTGACGTTCTTC                 | CCTCCACACCCAAGTATTTCCT<br>TA    |
| BAB3091 <sup>a</sup>                    | CACCACCCACACCTCATGTAATATTT<br>T        | AGCTTTGCACTGGTGTGGGAGAA         |
| BAB3094 <sup>a</sup>                    | CATGCAATCGCCATAGTACCTGATCT             | AAGCCCTCCGGTTCAAGTCCTAG<br>T    |
| BAB3095_I <sup>a</sup>                  | GGCCTGGGCTCTGTGAACAGTG                 | TCCTGCCATACACAAATGAAATTC<br>C   |
| BAB3095_II <sup>a</sup>                 | TGACAATTCCTTCGCAAAGTCTC                | GATTTTGCCTCCTTCACAGTGGTC        |
| BAB2861 <sup>a</sup>                    | TGACGCAATCCTTATCCTCCTGT                | GGGCATACACACATTCTTAGCTTT<br>TC  |
| BAB3084 <sup>a</sup>                    | CCTGACTAATACTTTATTCTACCCAT<br>GCCA     | TCCCAAGCTCCTCCTCGTCTTC          |
| BAB3089 <sup>a</sup>                    | CCCAAACAATCACAGGACAAGAAAC<br>A         | AGCCTTGCAAATAAACAGGCTTTG<br>AG  |
| BAB2822-<br>1.7K to RU2 <sup>a, b</sup> | CAGACATATTCTGAGCAGGCAACTG              | GCGTTAGTATTGTTCAAGCATGGT<br>TC  |
| RU2-1 <sup>st</sup> PCR <sup>c</sup>    | GAAAGGACCTGTGTATTTCTA <sub>t</sub> CGC | CCAGGTGGAGGAACCACaGAG           |
| RU2-2 <sup>nd</sup> PCR <sup>c</sup>    | CTTTTGTCTCCTCAGTTGCGAtT                | ATGGAAGAACTACCGAGTGTGTg<br>AC   |
| BAC-1 <sup>st</sup> PCR <sup>d</sup>    | GAAAGGACCTGTGTATTTCTA <sub>t</sub> CGC | CGAGGTGGAAGAACCACaGAG           |
| BAC-2 <sup>nd</sup> PCR <sup>d</sup>    | CTTTTGTCTCCTCAGTTGCGAtT                | GTGGAAGAACCACTGACTGTGaGG<br>AT  |

a: Long-range PCR was performed for these primer pairs. PCR condition included one cycle at 98°C/ 30 sec; 36 cycles at 94°C/ 60 sec, 65°C/ 20 sec, and 68°C/ 20 min; and one cycle at 68°C/ 10 min. 1M of betaine was added to facilitate the amplification. The regular *TaKaRa* PCR buffer (RR002M) was used.

b: PCR products have multiple bands. Bands were gel purified and selected for sequencing.

c: Two-step PCR was used to amplify breakpoints within the RU2 elements. The condition of the first PCR included one cycle at 94°C / 1 min; five cycles at 94°C / 30 sec, (60.5-0.5 per cycle) °C / 1 min, and 72°C / 2 min; 31 cycles at 94°C / 30 sec, 58°C / 1 min sec, and 72°C / 2 min; and one cycle at 72°C / 7 min. The Mg<sup>2+</sup> concentration was 2.5 mM. The condition of the second PCR included one cycle of 94°C / 1 min; 50 cycles of 94°C / 30 sec, 64°C / 1 min, and 72°C / 100 sec; and one cycle at 72°C / 7 min. The Mg<sup>2+</sup> concentration was 3 mM. *TaKaRa* GC buffer I (RR02AG) was used. The primer sequence in lower case indicates a mismatch with respect to the reference sequence.

d: Two-step PCR was used to amplify the RU2 element from the BAC DNA, RP11-527B14. PCR condition is the same as that described in c.



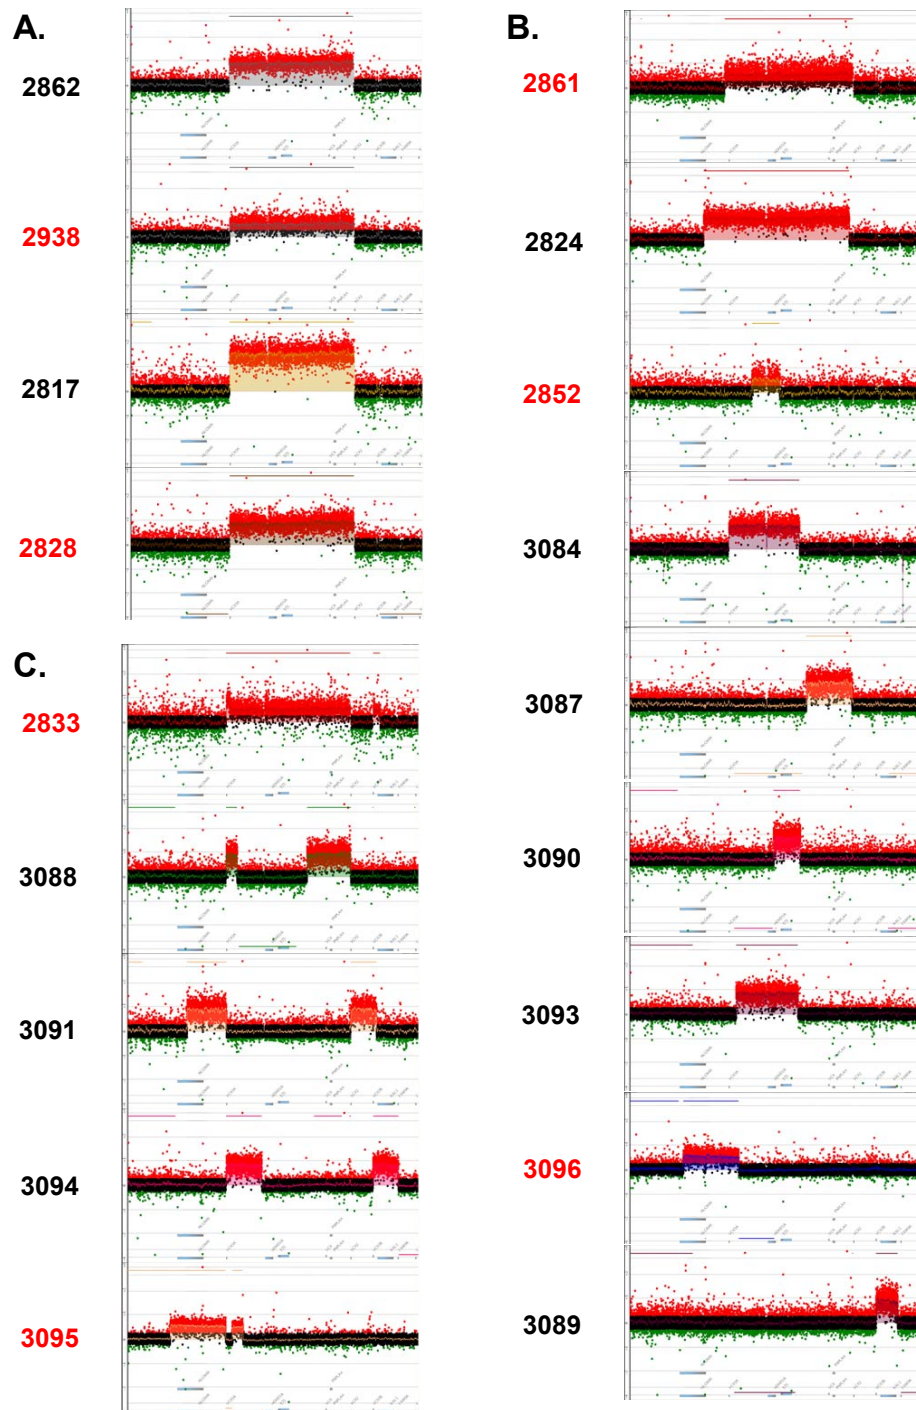

**Figure S1.** aCGH results of representative cases. The X-axis indicates genomic coordinates based on the reference haploid human genome sequence. The Y-axis indicates  $\log_2$  ratio of subject copy number/control copy number; red dots indicate gain

with respect to CGH control. Duplication in male/female has a log ratio of 1/ 0.58; triplication in male/female has a log ratio of 1.58/1. Each result is shown using the same scale. Black subject numbers indicate male and red indicate female. (A) Recurrent duplications and recurrent triplications. BAB2862 shows an example of a male with recurrent duplication. BAB2938 is an example of a female with recurrent duplication. BAB2817 is an example of a male with recurrent triplication. BAB2828 is an example of a female with recurrent triplication. (B) Array CGH results for subjects carrying nonrecurrent duplications. (C) Array CGH results for subjects carrying complex rearrangements.

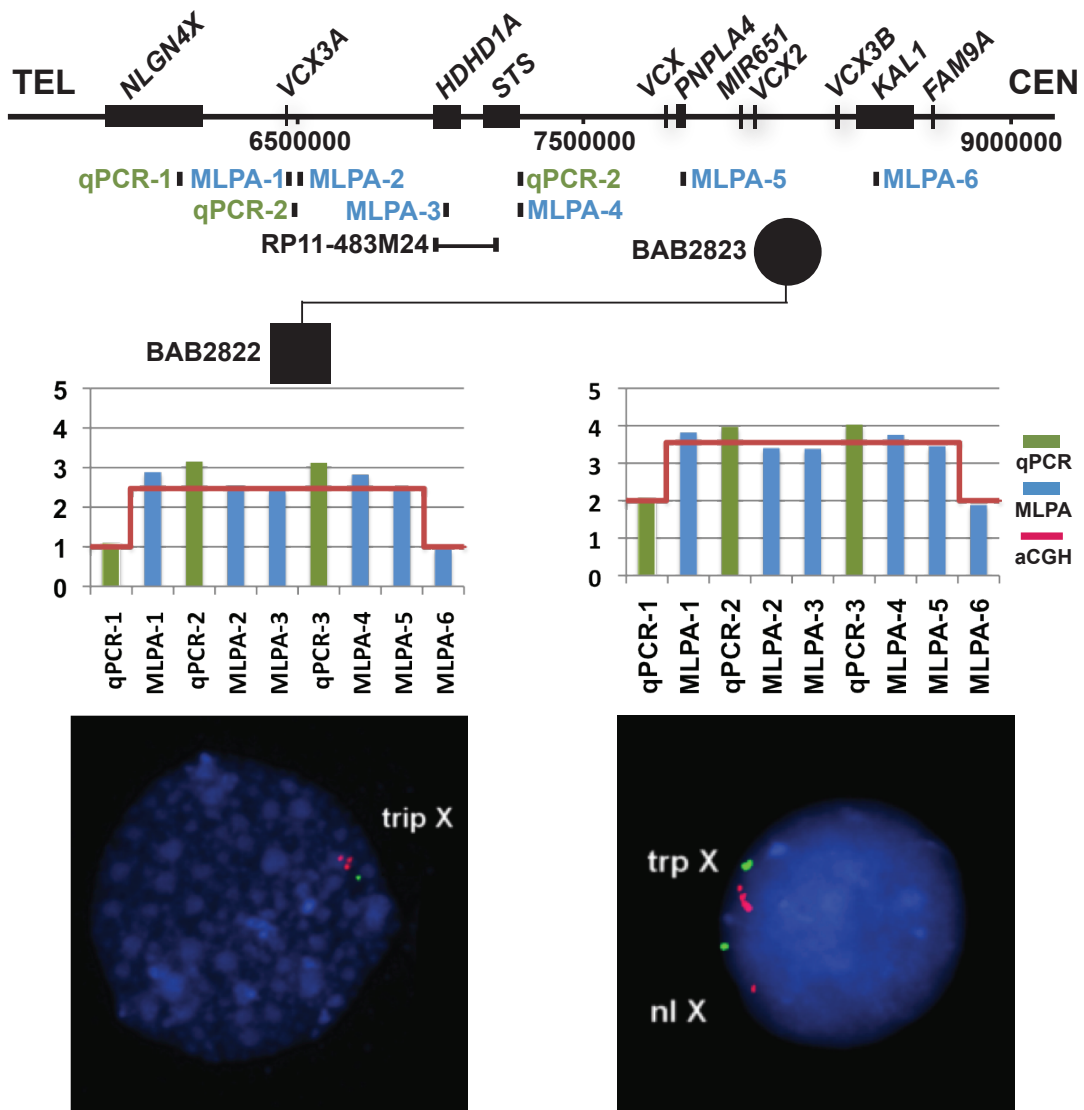

**Figure S2.** Ascertainment of triplications in subject BAB2822 and the mother. The figure legends are the same as Figure 2 in the Results section.

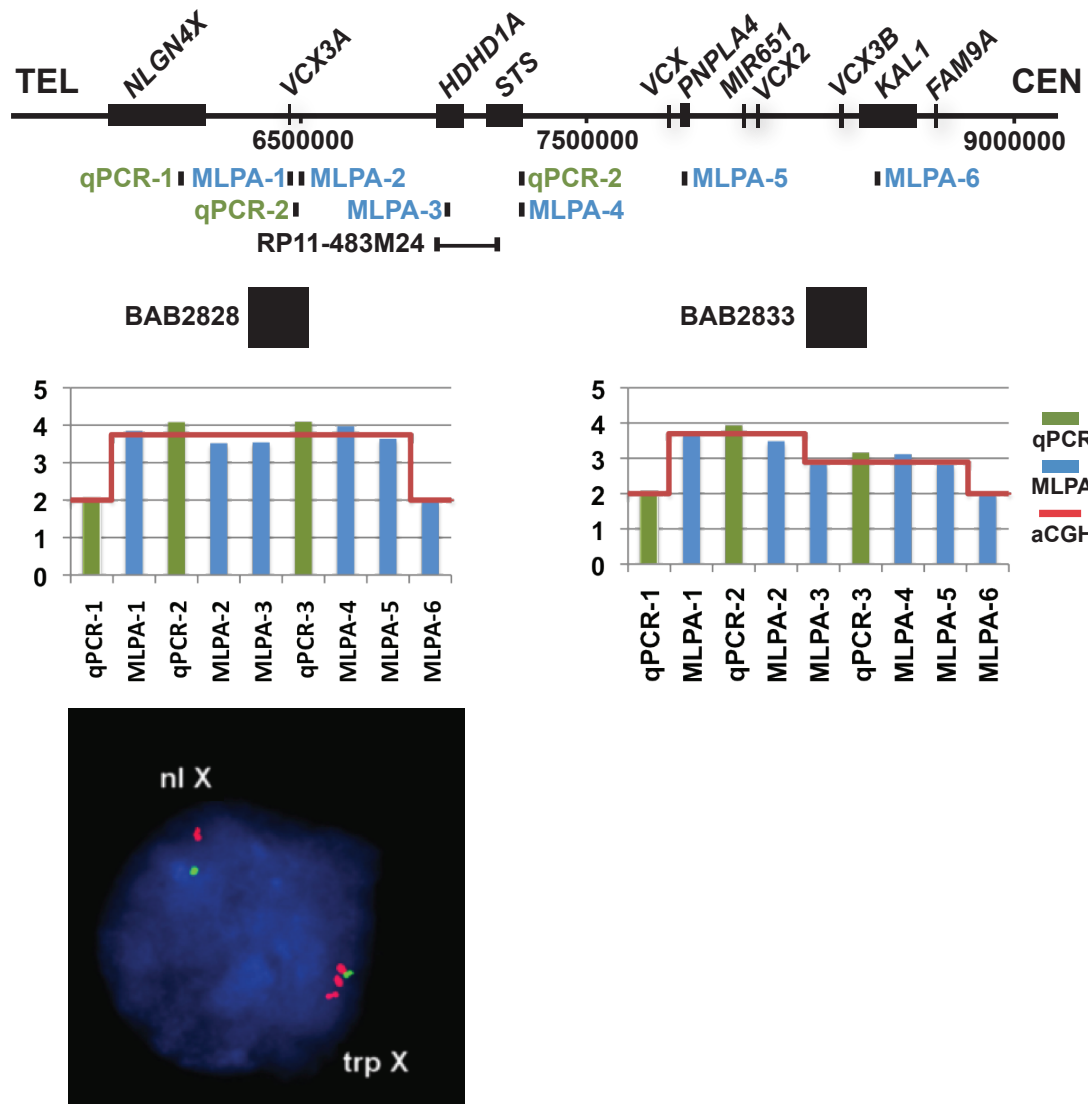

**Figure S3.** Ascertainment of triplications in subject BAB2828 and BAB2833. The figure legends are the same as Figure 2 in the Results section.
